# Supplementary material
Source: publisher site journal article supplement (https://www.dovepress.com/article/400511)
Supplement: Supplementary file 1 [file get_supplementary_file.php]

ORIGINAL RESEARCH

Ruojing Qian et al

**Ag/Ag2O with NIR-triggered Antibacterial Activities: Photocatalytic Sterilization Enhanced by Low-temperature Photothermal Effect**

Ruojing Qian1-3*

Zhaoyu Xu4*

Xingyu Hu1-3

Suru Liu1-3

Yao Mai1-3

Xinzhi Tan1-3

Xiaofan Su1-3

Mingyan Jiang1-3

Wei Tang1-3

Weidong Tian1-3

Li Xie1-3

1State Key Laboratory of Oral Diseases & National Clinical Research Center for Oral Diseases & National Engineering Laboratory for Oral Regenerative Medicine, West China Hospital of Stomatology, Sichuan University, Chengdu, China; 2Engineering Research Center of Oral Translational Medicine, Ministry of Education, West China Hospital of Stomatology, Sichuan University, Chengdu, China; 3Department of Oral and Maxillofacial Surgery, West China Hospital of Stomatology, Sichuan University, Chengdu, China; 4Department of Oral Implantology, West China Hospital of Stomatology, Sichuan University, Chengdu, China

*These authors contributed equally to this work

Correspondence:

Weidong Tian

State Key Laboratory of Oral Diseases & National Clinical Research Center for Oral Diseases & Engineering Research Center of Oral Translational Medicine, Ministry of Education & National Engineering Laboratory for Oral Regenerative Medicine, West China Hospital of Stomatology, Sichuan University, Chengdu, Sichuan 610041, China

Tel +86-28-85502156

Email [drtwd@sina.com](mailto:drtwd@sina.com)

Li Xie

State Key Laboratory of Oral Diseases & National Clinical Research Center for Oral Diseases & Engineering Research Center of Oral Translational Medicine, Ministry of Education & National Engineering Laboratory for Oral Regenerative Medicine, West China Hospital of Stomatology, Sichuan University, Chengdu, Sichuan 610041, China

Tel +86-28-85503499

Email [samuel@163.com](mailto:samuel@163.com)


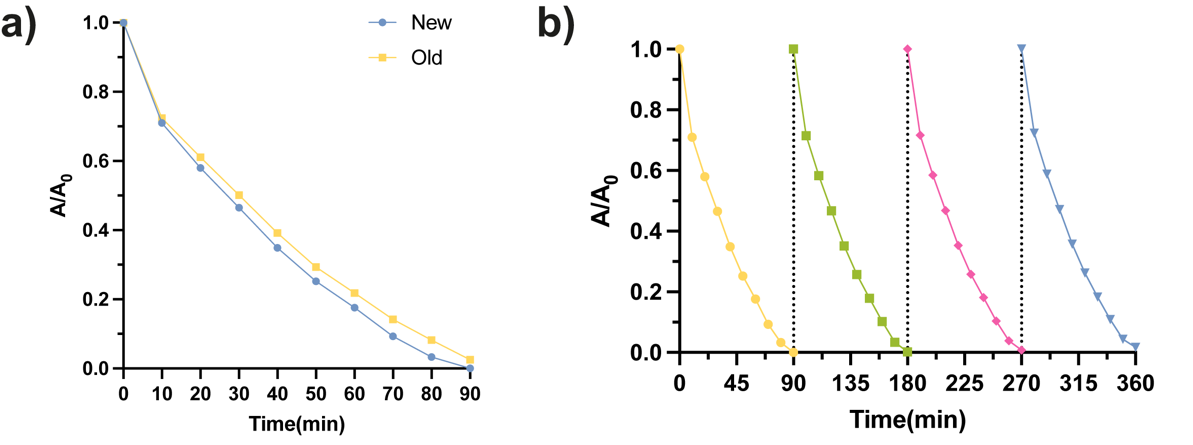


**Figure S1** (a) The comparison of the photocatalytic degradation activity under 808 nm NIR irradiation (0.5 W/cm2) of newly fabricated Ag/Ag2O and Ag/Ag2O stored for 15 d at room temperature. (b) Cycling runs of MB degradation of Ag/Ag2O under 808 nm NIR irradiation (0.5 W/cm2).
